# Supplementary material
Source: publisher figshare collection journal article supplement (https://acs.figshare.com/ndownloader/files/3737575)
Supplement: Supplementary file 1 [file 3737575]

## Supporting Information

### **Carbon stable isotope analysis of methylmercury toxin in biological materials by gas chromatography isotope ratio mass spectrometry**

J. Masbou<sup>1</sup>, D. Point<sup>\*,1</sup>, G. Guillou<sup>2</sup>, J. E. Sonke<sup>1</sup>, B. Lebreton<sup>2</sup>, P. Richard<sup>2</sup>

<sup>1</sup>Observatoire Midi-Pyrénées, Géosciences Environnement Toulouse, UMR CNRS 5563/IRD 234/Université Paul Sabatier Toulouse 3, 14 avenue Edouard Belin, 31400 Toulouse, France.

<sup>2</sup>UMR Littoral, Environnement et Sociétés (LIENSs), UMR 7266 CNRS-Université de La Rochelle, Institut du Littoral et de l'Environnement, 2 rue Olympe de Gouges, 17000 La Rochelle, France. \*Author for correspondence: [david.point@ird.fr](mailto:david.point@ird.fr)

## Table of content of the supporting information file

- Table S1: GC-C-IRMS instrumental conditions (Page S3)
- Table S2: Quantitative extraction and halogenation efficiency of the SEM on natural biological material determined by GC-SF-ICP-MS (Page S4-S6)
- Table S3: GC-SF-ICP-MS instrumental conditions (Page S7)
- Table S4: Summary of  $\delta^{13}\text{C}_{\text{CH}_3\text{Hg}}$  values obtained for the  $\text{CH}_3\text{Hg}$  primary standard solution, comparing short term and long term measurements using derivatization and halogenation methods (Page S8)
- Figure S1: Influence of the amount and type of derivatizing agent ( $\text{NaB}(\text{C}_2\text{H}_5)_4$  and  $\text{NaB}(\text{C}_3\text{H}_7)_4$ ) in solution on the derivatization efficiency of  $\text{CH}_3\text{Hg}$  and  $\text{iHg}$ , and associated influence on  $\delta^{13}\text{C}_{\text{CH}_3\text{Hg}}$  values (Page S9)
- Figure S2. GC-C-IRMS blank chromatograms of ethylation (a), propylation (b) and halogenation (c) conditions (Page S10)

**Table S1. Instrumental conditions for  $\delta^{13}\text{C}_{\text{CH}_3\text{Hg}}$  analysis by GC-C-IRMS**

| <b>GC parameters</b>   |                                                             |                                                          |
|------------------------|-------------------------------------------------------------|----------------------------------------------------------|
|                        | <b>Derivatization</b>                                       | <b>Halogenation</b>                                      |
| Column                 | Agilent DB-5<br>(30 m, 0.25 mm I.D., 0.25 $\mu\text{m}$ )   | Restek RTX-5<br>(30 m, 0.25 mm I.D., 0.1 $\mu\text{m}$ ) |
| GC program             | Initial temp.: 40°C                                         | Initial temp.: 40°C                                      |
|                        | Hold time: 2 min.                                           | Hold time: 2min.                                         |
|                        | Ramp: 5°C.min <sup>-1</sup> - 100°C                         | Ramp: 10°C.min <sup>-1</sup> - 120°C                     |
|                        | Hold time: 2 min.                                           | Hold time: 0 min.                                        |
|                        | Ramp: 50°C.min <sup>-1</sup> - 250°C                        | Ramp: 35°C.min <sup>-1</sup> - 250°C                     |
|                        | Hold time: 1 min.                                           | Hold time: 1 min.                                        |
| Carrier gaz (He)       | 1.4 ml.min <sup>-1</sup>                                    | 1.4 ml.min <sup>-1</sup>                                 |
| Injector set up        | 250°C                                                       | 250°C                                                    |
|                        | Splitless (SSL), 1 $\mu\text{l}$                            | Splitless (SSL), 3 $\mu\text{l}$                         |
| <b>IRMS parameters</b> |                                                             |                                                          |
|                        | <b>Derivatization</b>                                       | <b>Halogenation</b>                                      |
| GC-C-IRMS              | Delta V Advantage IRMS (Thermo Scientific, Bremen, Germany) |                                                          |
|                        | GC-Isolink system (Thermo Scientific, Bremen, Germany)      |                                                          |
|                        | Combustion furnace: 1000°C                                  |                                                          |
| Peak detection methods | ISODAT "Individual Background" method                       | ISODAT "CalcMean background" method                      |
|                        | Start slope:0.4mV.s <sup>-1</sup>                           | Start slope:2mV.s <sup>-1</sup>                          |
|                        | End slope:0.2mV.s <sup>-1</sup>                             | End slope:2mV.s <sup>-1</sup>                            |
|                        | Background time=5s                                          | Background time=1s                                       |

**Table S2: Quantitative extraction and halogenation efficiency of CH<sub>3</sub>Hg from biological material processed by SEM and determined by GC-SF-ICP-MS.**

| Mass of ERM-CE464 tuna fish extracted (g) | Derivatization/<br>Halogenation | Quantification           | Recovery<br>±SD<br>(%) | Ref.         |
|-------------------------------------------|---------------------------------|--------------------------|------------------------|--------------|
| 0.25                                      | Propylation                     | Isotope dilution         | 98±3                   | <sup>1</sup> |
| 0.25                                      | Halogenation                    | Isotope dilution         | 96±3                   | This study   |
| 1                                         | Halogenation                    | External calibration*    | 105±16                 | This study   |
| 4                                         | Halogenation                    | External calibration*,** | 97±12                  | This study   |

\*Determined by external calibration using an independent CH<sub>3</sub>HgI standard calibration curve (calibration curve standards not processed by SEM, and not evaporated)

\*\* Independent measurement performed on the same solution analyzed in Table 1 by GC-C-IR-MS, and diluted by volume in hexane to account for the difference of sensitivity between GC-C-IR-MS and GC-SF-ICP-MS. The slight but larger uncertainty on the recovery value measured by GC-SF-ICP-MS (Table S2) relative to GC-C-IR-MS (Table1) is primarily due to the dilution uncertainties caused by the need to work at the level of a few µL of solvent solutions taken originally from the limited hexane solution available for GC-C-IR-MS analysis.

Mercury speciation analysis of SEM final CH<sub>3</sub>Hg-thiosulfate extracts quantified by isotope dilution and external calibration conditions are summarized in the table above. All samples were prepared under the conditions used for GC-C-IR-MS analysis, which consisted of applying the SEM procedure, the halogenation of CH<sub>3</sub>Hg in hexane, and its

final preconcentration under a N<sub>2</sub> stream. These solutions were then diluted back into hexane to account for the significantly higher sensitivity of GC-SF-ICP-MS. Measurements were performed by isotope dilution ID-GC-SF-ICPMS analysis (see Table S3) using an enriched CH<sub>3</sub><sup>201</sup>Hg standard (ISC, Spain) and experimental conditions detailed elsewhere<sup>1</sup>. Complementary measurements by GC-SF-ICPMS obtained by external calibration using CH<sub>3</sub>HgI standards prepared from the CH<sub>3</sub>Hg stock solution were also performed for comparison. Results show that similar and quantitative CH<sub>3</sub>Hg recovery results were obtained when processing approximately 0.25g of ERM-CE464 Tuna fish material by species-specific isotope dilution quantification using either propylation and halogenation conditions applied to the same final CH<sub>3</sub>Hg thiosulfate solutions. This suggests that CH<sub>3</sub>Hg is efficiently and quantitatively extracted from the biological tissue matrix, confirming earlier results<sup>1</sup>. This also indicates that both derivatization and halogenation method forming CH<sub>3</sub>HgC<sub>3</sub>H<sub>7</sub> and CH<sub>3</sub>HgI compounds respectively lead to accurate determinations when isotope dilution quantification approaches are used. Similar quantitative extraction efficiencies and accurate determination without matrix effects could also be achieved using the halogenation method while extracting larger quantities of ERM-CE464 material and determining CH<sub>3</sub>Hg concentrations by external calibration using an independent CH<sub>3</sub>HgI standard calibration curve. Both approaches confirm the robustness and efficiency of the SEM, leading to a quantitative extraction of CH<sub>3</sub>Hg from biological materials when processing different sample mass (0.25-4g), the further quantitative formation of the CH<sub>3</sub>HgI complex, and the absence of loss during the N<sub>2</sub> preconcentration step. Note that a

complementary test consisting of performing a second CH<sub>3</sub>Hg extraction from the acidic solution of the SEM with an additional 10 ml of toluene was performed. Results indicated that CH<sub>3</sub>Hg values were similar to blank levels, confirming that CH<sub>3</sub>Hg was quantitatively extracted within the first 10mL of Toluene used in the SEM procedure.

**Table S3: Instrumental conditions for ID-GC-SF-ICP-MS analysis**

|                          | <b>GC parameters</b>                                                                               |                                                                                                   |
|--------------------------|----------------------------------------------------------------------------------------------------|---------------------------------------------------------------------------------------------------|
|                          | <b>Derivatization</b>                                                                              | <b>Halogenation</b>                                                                               |
| Column                   | Agilent DB-5<br>(30 m, 0.25 mm I.D., 0.25 $\mu$ m)                                                 | Restek RTX-5<br>(30 m, 0.25 mm I.D., 0.1 $\mu$ m)                                                 |
| GC program               | Initial temp: 40°C<br>Hold time: 1 min<br>Ramp: 35°C.min <sup>-1</sup> - 250°C<br>Hold time: 2 min | Initial temp: 60°C<br>Hold time: 1min<br>Ramp: 30°C.min <sup>-1</sup> - 250°C<br>Hold time: 2 min |
| Carrier gaz (He)         | 0.7 ml.min <sup>-1</sup>                                                                           | 1.0 ml.min <sup>-1</sup>                                                                          |
| Make-up gas (Ar)         | 0.7 L.min <sup>-1</sup>                                                                            | 0.7 L.min <sup>-1</sup>                                                                           |
| Injector Set Up          | 250°C PTV splitless (1 $\mu$ l)                                                                    | 250°C PTV splitless (1 $\mu$ l)                                                                   |
| Transfer Line (T°C):     | 250°C                                                                                              |                                                                                                   |
|                          | <b>SF-ICP-MS parameters</b>                                                                        |                                                                                                   |
| Set Up                   | Element XR SF-ICP-MS (Thermo Scientific, Bremen, Germany)                                          |                                                                                                   |
| Rf Power                 | 1200W                                                                                              |                                                                                                   |
| Cool gas                 | 16 L.min <sup>-1</sup>                                                                             |                                                                                                   |
| Auxiliary gas            | 0.8 L.min <sup>-1</sup>                                                                            |                                                                                                   |
| Nebulizer gas            | 0.45 L.min <sup>-1</sup>                                                                           |                                                                                                   |
| Isotopes/<br>dwell times | Hg : 196, 198, 199, 200, 201, 202, 204 (40ms)<br>Tl : 203, 205 (30ms)                              |                                                                                                   |

**Table S4: Summary of  $\delta^{13}\text{C}_{\text{CH}_3\text{Hg}}$  values obtained for the  $\text{CH}_3\text{Hg}$  primary standard solution, comparing short term and long term experiments using derivatization and halogenation methods.** The consensus mean value represents the mean of all long-term propylated and halogenated  $\delta^{13}\text{C}_{\text{CH}_3\text{Hg}}$  measurements. The long-term reproducibility was evaluated by repeated injection of a 36 ng of  $\text{CH}_3\text{Hg}$  (8 ng as C) propylated  $\text{CH}_3\text{Hg}$  standard over a period of 3 days and of a 37-283 ng of  $\text{CH}_3\text{HgI}$  (2 to 16 ng as C) over a period 6 days.

|                                              | Propylation experiments*<br>$\text{CH}_3\text{Hg}(\text{C}_2\text{H}_5)$ | Ethylation experiments*<br>$\text{CH}_3\text{Hg}(\text{C}_3\text{H}_7)$ | Long term reproducibility propylation<br>8 ng.C /3days | Halogenation experiments<br>( $\text{CH}_3\text{HgI}$ ) | Long term reproducibility halogenation<br>7 ng.C /3days | Long term reproducibility halogenation<br>2-16 ng.C /6days | Consensus Mean  |
|----------------------------------------------|--------------------------------------------------------------------------|-------------------------------------------------------------------------|--------------------------------------------------------|---------------------------------------------------------|---------------------------------------------------------|------------------------------------------------------------|-----------------|
| $\delta^{13}\text{C}_{\text{CH}_3\text{Hg}}$ |                                                                          |                                                                         |                                                        |                                                         |                                                         |                                                            |                 |
| $\pm 2\text{SD}$                             | -54.8 $\pm$ 1.8                                                          | -54.9 $\pm$ 2.2                                                         | -53.9 $\pm$ 1.5                                        | -54.0 $\pm$ 0.7                                         | -53.6 $\pm$ 0.7                                         | -53.7 $\pm$ 0.9                                            | -53.8 $\pm$ 1.1 |
| (‰)                                          | (11)                                                                     | (10)                                                                    | (8)                                                    | (12)                                                    | (7)                                                     | (24)                                                       | (32)            |
| (n)                                          |                                                                          |                                                                         |                                                        |                                                         |                                                         |                                                            |                 |

\* Data obtained from figure 3 and ESI\_figure 1



**Figure S1: Influence of the amount and type of derivatizing agent (NaBEt<sub>4</sub> and NaBPr<sub>4</sub>) in solution on the derivatization efficiency of CH<sub>3</sub>Hg and iHg, and associated determinations of  $\delta^{13}\text{C}_{\text{CH}_3\text{Hg}}$  values.** In both experiments, the derivatization of 21  $\mu\text{g}$  of CH<sub>3</sub>Hg (1.6  $\mu\text{g}$  as C) and 20  $\mu\text{g}$  of iHg was performed into 1.75ml MQ water. The derivatized compounds were backextracted into 0.5 mL of hexane. The results showed the absence of a significant effect of the amount and type of derivatization agent used on the determination of  $\delta^{13}\text{C}_{\text{CH}_3\text{Hg}}$  values. Quantitative derivatization yields are reached while using 2 mg of NaB(C<sub>2</sub>H<sub>5</sub>)<sub>4</sub> and 0.7 mg of NaB(C<sub>3</sub>H<sub>7</sub>)<sub>4</sub>. Consensus mean values (plain line) and their uncertainties (dashed lines ( $\pm 2\text{SD}$ )) are based on all measurements.

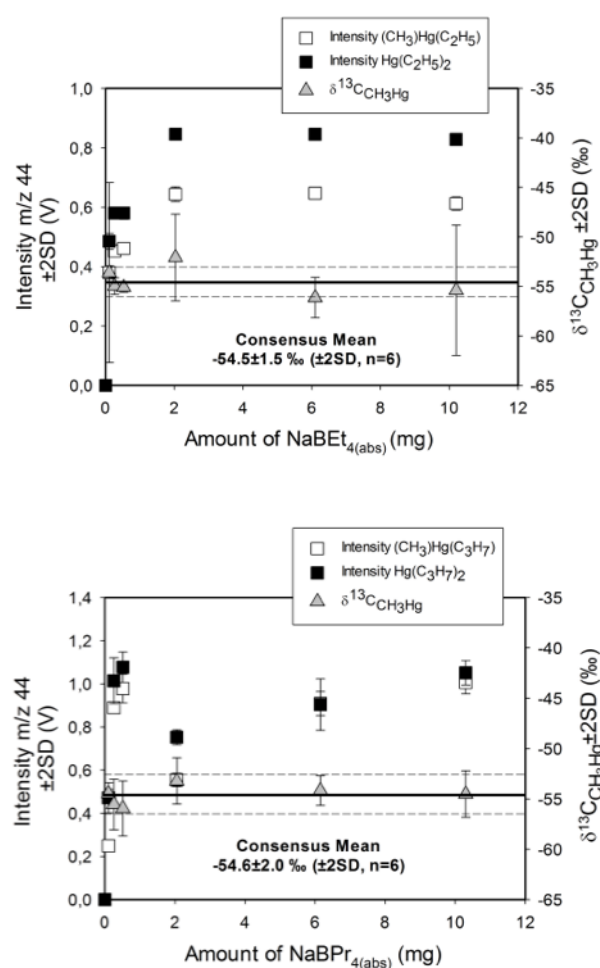

Figure S2. GC-C-IRMS blank chromatograms of ethylation (a), propylation (b) and halogenation (c) conditions

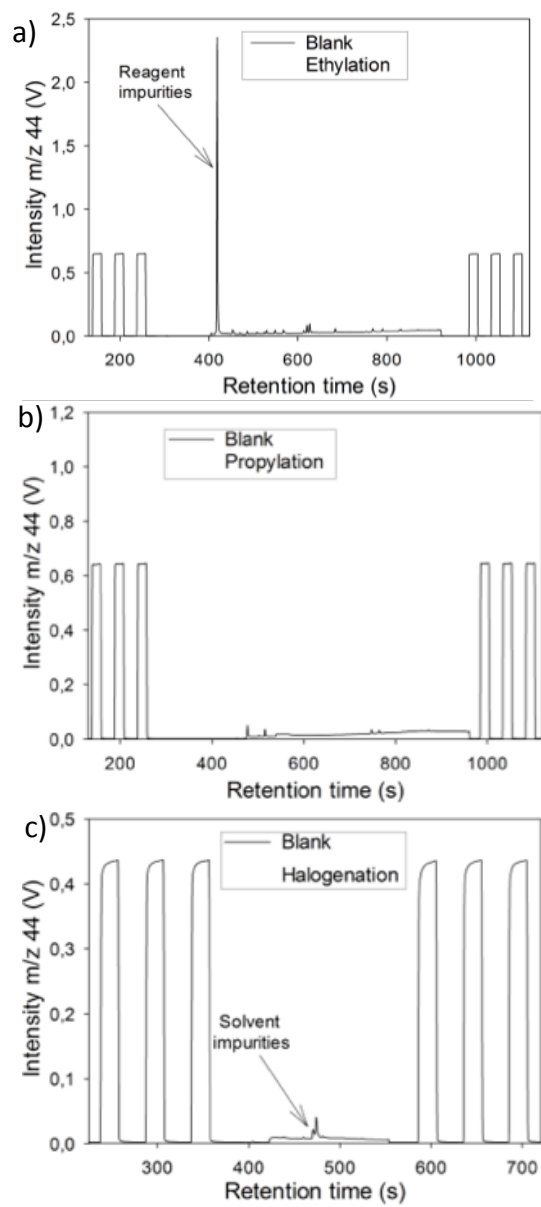

## References

- (1) Masbou, J.; Point, D.; Sonke, J. E. *Journal of Analytical Atomic Spectrometry* **2013**.
